# Supplementary material
Source: bioRxiv or medRxiv preprint supplement (https://www.biorxiv.org/content/biorxiv/early/2019/08/06/726737.1/DC3/embed/media-3.pdf)
Supplement: Supplementary file [file media-3.pdf]

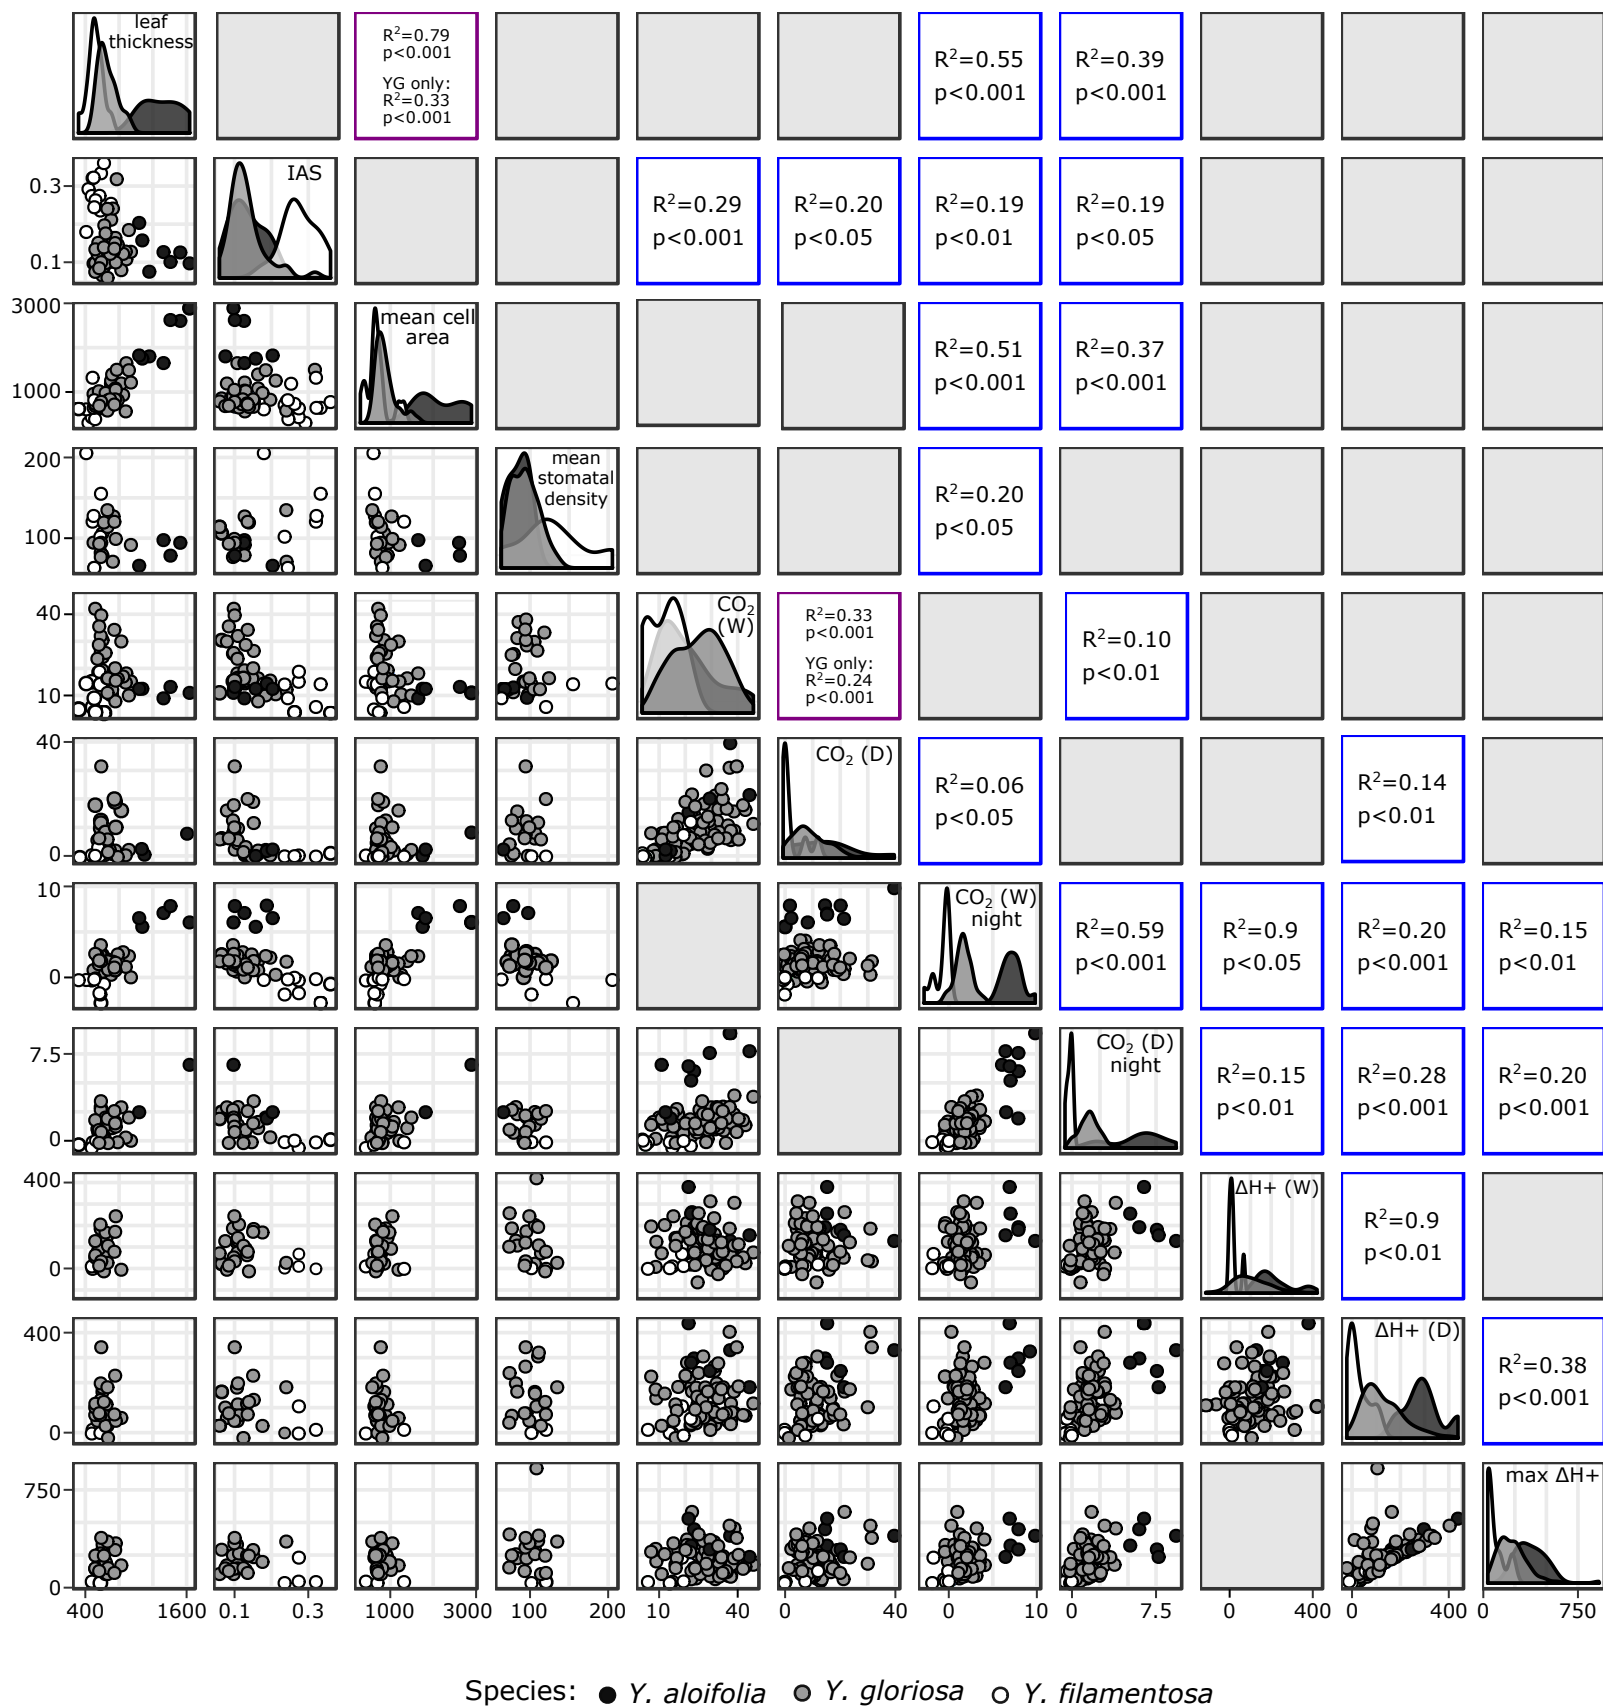

**Supplemental Figure 3** - Pairwise scatterplots for all traits on the lower diagonal, with density graphs on the diagonal and  $R^2$  and  $p$ -value if significant on the upper diagonal. Purple outline indicates the two pairwise trait correlations that were significant in *Y. gloriosa*, and the corresponding  $R^2$  and  $p$ -values are reported.
